1     **“Comparative Analysis of Gut Microbiome in Individuals of the Old Civilization of**  
2                     **Caral-Supe Based on Data from 16S rRNA and ITS region”**

3     Andrés Vásquez-Domínguez<sup>1,2\*</sup>, Luis Jaramillo-Valverde<sup>1,2,3\*</sup>, Kelly S. Levano<sup>1,2</sup>, Pedro  
4     Novoa-Bellota<sup>4</sup>, Marco Machaguay-Romero<sup>4</sup>, Ruth Shady Solis<sup>4</sup>, Heinner Guio<sup>1,2,3</sup>

5  
6     <sup>1</sup> ALBIOTEC, Lima, Peru

7     <sup>2</sup> INBIOMEDIC Research and Technological Center, Lima, Peru

8     <sup>3</sup> Universidad de Huánuco, Huánuco, Peru

9     <sup>4</sup> Zona Arqueológica Caral, Unidad Ejecutora 003, Ministerio de Cultura., Lima, Peru

10

11     Corresponding author

12     E-mail: heinnerguio@gmail.com

13     \*These authors contributed equally to this work

14

15     **ABSTRACT:** Genetic and microbiome studies of ancient Caral-Supe civilization have  
16     not yet been published. For this reason, the objective of this work is to identify the  
17     microorganisms and possible diseases that existed in this ancient civilization using  
18     coprolites samples. To do this, two coprolites samples were analyzing through high-  
19     throughput sequencing data of 16S rRNA gene and an intergenic region (ITS).

20     **CONTENT**

21     The Caral-Supe civilization (3500 BC), the oldest in Peru and America and  
22     contemporary to the Mesopotamia, Egypt, India and China civilizations (1), was  
23     discovered by anthropologist and archeologist Dr. Ruth Shady.

24     The Caral-Supe population relied both in agricultural and marine products, permanently  
25     available through a local exchange network (2). Genetic and microbiome studies of the  
26     Caral civilization have not yet been published. In the present study, we characterized the  
27     gut microbiome of this civilization using coprolites samples found near the Sacred City  
28     of Caral. Coprolites (fossilized fecal material) provide information on the composition  
29     of the intestinal microbiota, and thus help us obtain information of cultural practices,  
30     dietary habits, and individual's gut microbiota state (3). High-throughput sequence  
31     analysis of the 16S rRNA gene and an intergenic region (ITS) was performed to study  
32     two coprolites samples (PACS-176 and PEACS-329), provided by the Zona

33 Arqueológica Caral. Molecular processes were carried out at the INBIOMEDIC  
34 laboratory. Biosecurity measures and standard precautions were used for ancient DNA  
35 work. Prior to DNA extraction, samples were prepared by discarding the outermost  
36 portions of the coprolite samples to eliminate risk of contamination, and a replica of  
37 each sample was obtained for further analysis. Ancient genomic DNA was extracted  
38 using the PowerSoil DNA Isolation Kit from Qiagen, following the manufacturer's  
39 instructions (4).

40 The V4 variable region of bacterial 16S rRNA genes was targeted for high throughput  
41 sequencing using predetermined primers 515F (GTGYCAGCMGCCGCGGTAA) and  
42 806R (GGACTACNVGGGTWTCTAAT). In addition, for genetic identification of  
43 fungi, ITS analysis was performed using primers ITS1  
44 (CTTGGTCATTTAGAGGAAGTAA) and ITS4 (GCTGCGTTCTTCATCGATGC)  
45 (5).

46 Library construction and sequencing was performed in MR-DNA laboratory  
47 ([www.mrdnalab.com](http://www.mrdnalab.com) , Shallowater, TX, USA), and sequences were determined using  
48 an Illumina MiSeq instrument following the manufacturer's guidelines. Barcodes,  
49 sequences <150 bp, sequences with ambiguous bases, and homopolymer runs greater  
50 than 6 bp were removed; using the open access software [www.mrdnafreesoftware.com](http://www.mrdnafreesoftware.com).  
51 Operative taxonomic units (OTU) were generated and chimeras were filtered. The  
52 OTUs were defined by grouping at a 3% divergence (97% similarity). The final OTUs  
53 were taxonomically classified using BLASTn against a database derived from RDPII  
54 (<http://rdp.cme.msu.edu> ) and NCBI ([www.ncbi.nlm.nih.gov](http://www.ncbi.nlm.nih.gov) ).

55 In both coprolites samples examined, the most representative OTUs at the phylum level  
56 for 16S rRNA bacterial genes was the Firmicutes (PEACS-329 with 36.44% and PACS-  
57 176 with 98.91%) (Fig 1). Similarly, for ITS analysis, the most prevalent phylum was  
58 Ascomycota (PEACS-329 with 99.92% and PACS-176 with 99.99%) (Fig 2).  
59 Firmicutes is one of the most frequent phylum in the human intestinal microbiota and is  
60 related to cardiovascular problems (6).

61 At the genus level for 16S rRNA bacterial genes, the OTUs showed *Halospirulina sp.* to  
62 be the most representative (21.96%) for the sample PEACS-329 and *Virgibacillus sp.*  
63 with 87.04% for the PACS-176 sample (Table 1). For ITS analysis, the most frequent  
64 OTU was *Phialosimplex sp.* (PEACS-329 with 77.49% and PACS-176 with 74.88%)

65 (Table 2). *Virgibacillus sp.* is a well representative genus of the phylum Firmicutes (7),  
66 which is the phylum most frequently found in both samples.

67 The present study has allowed the development of a comparative analysis of gut  
68 microbial diversity in coprolites from the Caral civilization. Further analysis will be  
69 carried out with additional coprolites samples to further identify organisms that  
70 colonized the gut microbiome of the Caral-Supe ancient inhabitants; and in this way be  
71 able to determine the lifestyle (diet) and its influence on the gut microbial communities.

## 72 **ACKNOWLEDGMENTS**

73 The Fondo Nacional de Desarrollo Científico, Tecnológico y de Innovación  
74 Tecnológica (FONDECYT) and BANCO MUNDIAL with contract number E043-2018-  
75 FONDECYT/BM-IADT-AV., supported this study The funders had no role in the study  
76 design, the data collection and interpretation, or the decision to submit the work for  
77 publication.

## 78 **REFERENCES**

- 79 1. La ciudad sagrada de Caral-Supe en los albores de la civilización en el Perú [Internet].  
80 [cited 2020 Apr 17]. Available from:  
81 [http://sisbib.unmsm.edu.pe/bibvirtual/libros/Arqueologia/ciudad\\_sagrada/indice.htm](http://sisbib.unmsm.edu.pe/bibvirtual/libros/Arqueologia/ciudad_sagrada/indice.htm)
- 82 2. Shady R, Machacuay M, Novoa P, Quispe E, Leyva C, De E, et al. Centros Urbanos de  
83 la Civilización Caral: 21 años recuperando la historia sobre el Sistema Social [Internet].  
84 [cited 2020 Apr 17]. Available from: [www.zonacaral.gob.pe](http://www.zonacaral.gob.pe)
- 85 3. Santiago-Rodriguez TM, Narganes-Storde YM, Chanlatte L, Crespo-Torres E, Toranzos  
86 GA, Jimenez-Flores R, et al. Microbial Communities in Pre-Columbian Coprolites.  
87 Hawks J, editor. PLoS One [Internet]. 2013 Jun 5 [cited 2020 Apr 17];8(6):e65191.  
88 Available from: <https://dx.plos.org/10.1371/journal.pone.0065191>
- 89 4. DNeasy PowerSoil Kit Handbook - QIAGEN [Internet]. [cited 2020 Apr 17]. Available  
90 from: [https://www.qiagen.com/us/resources/resourcedetail?id=5a0517a7-711d-4085-  
91 8a28-2bb25fab828a&lang=en](https://www.qiagen.com/us/resources/resourcedetail?id=5a0517a7-711d-4085-8a28-2bb25fab828a&lang=en)
- 92 5. Santiago-Rodriguez TM, Fornaciari G, Luciani S, Toranzos GA, Marota I, Giuffra V, et  
93 al. Gut microbiome and putative resistome of inca and italian nobility mummies. Genes  
94 (Basel) [Internet]. 2017 Nov 1 [cited 2020 Apr 17];8(11). Available from:  
95 <http://www.ncbi.nlm.nih.gov/pubmed/29112136>

- 96 6. Haakensen M, Dobson CM, Deneer H, Ziola B. Real-time PCR detection of bacteria  
97 belonging to the Firmicutes Phylum. *Int J Food Microbiol* [Internet]. 2008 Jul 31 [cited  
98 2020 Apr 17];125(3):236–41. Available from:  
99 <https://linkinghub.elsevier.com/retrieve/pii/S0168160508001670>
- 100 7. Heyndrickx M, Lebbe L, Kersters K, De Vos P, Forsyth G, Logan NA. *Virgibacillus*: A  
101 new genus to accommodate *Bacillus pantothenicus* (Proom and Knight 1950). Emended  
102 description of *Virgibacillus pantothenicus*. *Int J Syst Bacteriol*. 1998 Jan 1;48(1):99–  
103 106.
- 104

105 **FIGURES**

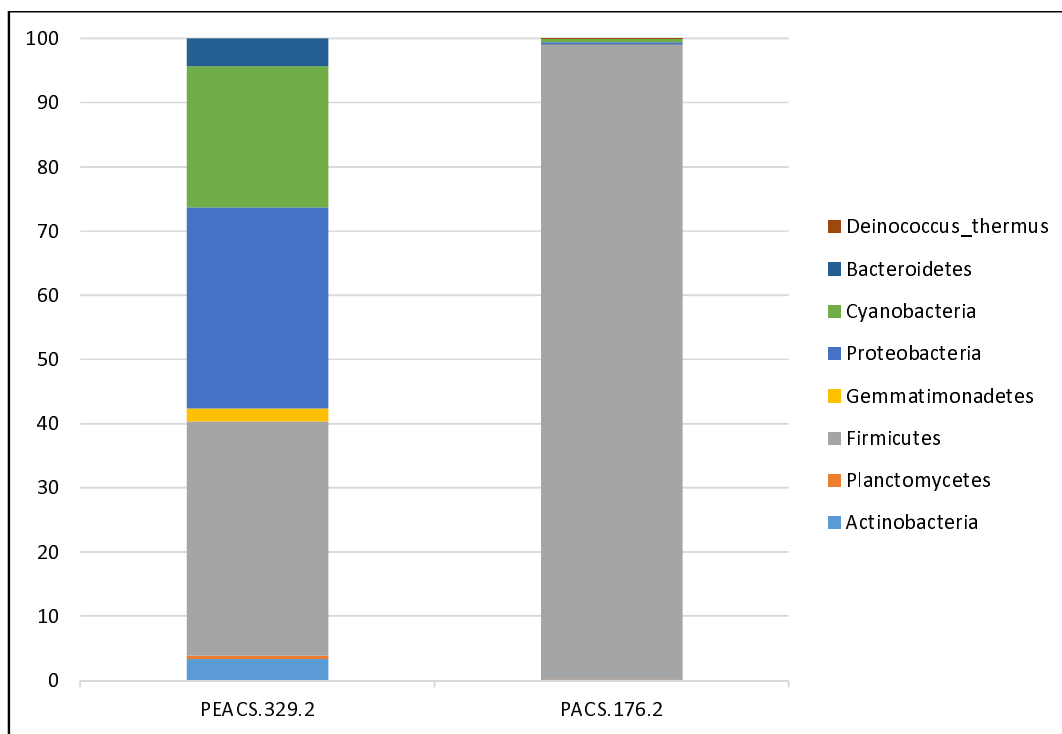

106

107 **FIG 1** Bar chart representing bacterial diversity of coprolites based on 16S rRNA amplicon  
108 analysis. The relative abundance (%) at the phylum level is shown.

109

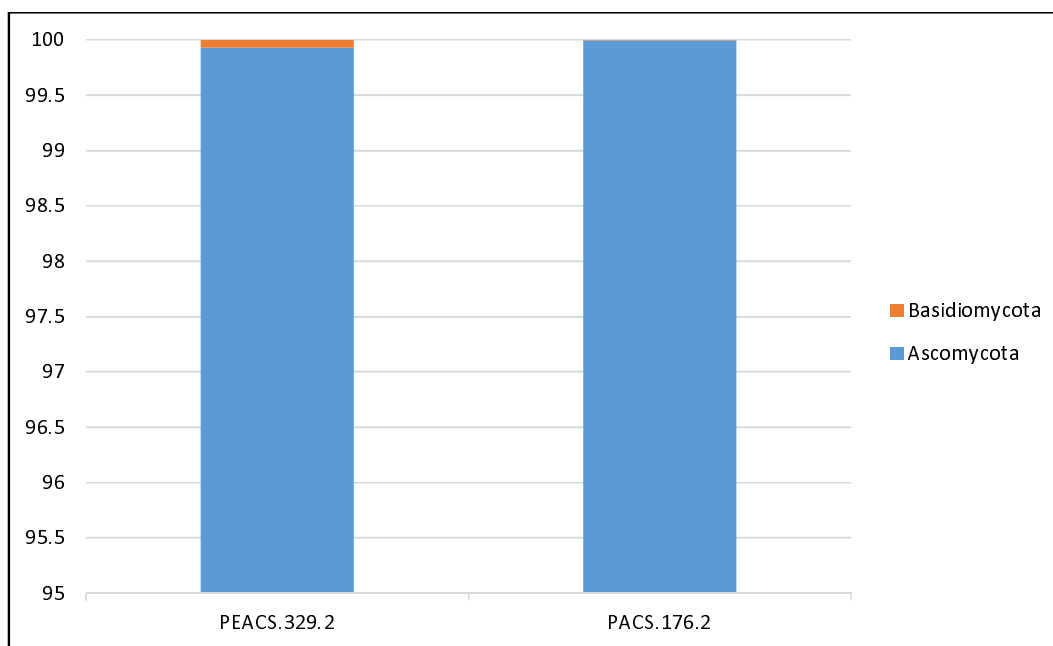

110

111 **FIG 2** Bar chart representing fungal diversity of coprolites based on ITS amplicon analysis.  
112 The relative abundance (%) at the phylum level is shown

113 **TABLE I: Analysis of Bacterial taxa impacting clustering of PEACS 329.2 and PACS 176.2**  
 114 *Coprolite.*

| Putative Taxon               | PEACS.329.2 |           | PACS.176.2 |           |
|------------------------------|-------------|-----------|------------|-----------|
|                              | Abund.      | Contrib % | Abund.     | Contrib % |
| <i>Halospirulina sp.</i>     | 576         | 21.96     | 439        | 0.54      |
| <i>Pseudomonas sp.</i>       | 459         | 17.50     | 168        | 0.21      |
| <i>Virgibacillus sp.</i>     | 439         | 16.74     | 70790      | 87.04     |
| <i>Scopulibacillus sp.</i>   | 124         | 4.73      | 14         | 0.02      |
| <i>Sinorhizobium sp.</i>     | 103         | 3.93      | 4          | 0.00      |
| <i>Stenotrophomonas sp.</i>  | 85          | 3.24      | 12         | 0.01      |
| <i>Melghirimyces sp.</i>     | 58          | 2.21      | 13         | 0.02      |
| <i>Gemmatimonas sp.</i>      | 54          | 2.06      | 3          | 0.00      |
| <i>Sphingomonas sp.</i>      | 52          | 1.98      | 4          | 0.00      |
| <i>Lentibacillus sp.</i>     | 48          | 1.83      | 9142       | 11.24     |
| <i>Micrococcus sp.</i>       | 47          | 1.79      | 6          | 0.01      |
| <i>Streptococcus sp.</i>     | 44          | 1.68      | 10         | 0.01      |
| <i>Methyloversatilis sp.</i> | 41          | 1.56      | 19         | 0.02      |
| <i>Bacteroides sp.</i>       | 38          | 1.45      | 1          | 0.00      |
| <i>Ruminococcus sp.</i>      | 34          | 1.30      | 6          | 0.01      |
| <i>Tuberibacillus sp.</i>    | 34          | 1.30      | 250        | 0.31      |
| <i>Prevotella sp.</i>        | 33          | 1.26      | 1          | 0.00      |
| <i>Pullulanibacillus sp.</i> | 30          | 1.14      | 91         | 0.11      |
| <i>Corynebacterium sp.</i>   | 25          | 1.11      | 21         | 0.03      |
| Less than 1% abundance       | -           | 11.25     | -          | 0.41      |

115 **TABLE 2:** Analysis of Fungal taxa impacting clustering of PEACS 329.2 and PACS 176.2  
116 Coprolites.

| Putative Taxon           | PEACS.329.2 |           | PACS.176.2 |           |
|--------------------------|-------------|-----------|------------|-----------|
|                          | Abund.      | Contrib % | Abund.     | Contrib % |
| <i>Phialosimplex sp.</i> | 89689       | 77.49     | 48746      | 74.88     |
| <i>Aspergillus sp.</i>   | 17775       | 15.36     | 15262      | 23.44     |
| <i>Epicoccum sp.</i>     | 7752        | 6.70      | 306        | 0.47      |
| <i>Penicillium sp.</i>   | 245         | 0.21      | 11         | 0.02      |
| <i>Saccharomyces sp.</i> | 124         | 0.11      | 8          | 0.01      |
| <i>Malassezia sp.</i>    | 82          | 0.07      | 5          | 0.01      |
| <i>Fusarium sp.</i>      | 67          | 0.06      | 751        | 1.15      |
| <i>Phoma sp.</i>         | 8           | 0.01      | 0          | 0.00      |
| <i>Alternaria sp.</i>    | 0           | 0.00      | 11         | 0.02      |

117
